# Supplementary material
Source: PubMed Central journal article supplement (PMC2441659)
Supplement: E07-05-0521_1.pdf [file E07-05-0521_1.pdf]

## Index of Online Supplemental Material:

### SUPPLEMENTAL FIGURE LEGENDS

**Figure S1: ARH localizes to the centrosome in different cell types, and using different antibodies.** Single channel and merged images of ARH and  $\gamma$ -tubulin in HeLa cells (A-C) and bovine aortic endothelial cells. (D-F) Insets show magnified version of the centrosome region. Yellow pixels in the merged panel represent co-localization of ARH with  $\gamma$ -tubulin at the centrosome. (D-F) ARH similarly co-localizes with  $\gamma$ -tubulin at the centrosome in bovine aortic endothelial cells. (G-I) The localization of ARH at the centrosome in HeLa cells was verified using an ARH antibody from Dr. Linton Traub. Cells were fixed with methanol and stained with ARH (red),  $\gamma$ -tubulin (green) and DAPI (blue, to stain nuclei). Bar: 6.5  $\mu\text{m}$ . Insets: 2.2  $\mu\text{m}$

**Figure S2. *ARH*<sup>-/-</sup> MEFs reform microtubules in an identical fashion to wild-type MEFs.** wt (A-D) and *ARH*<sup>-/-</sup> MEF cells (E-H) were either untreated (A,E) or treated with nocodazole (5  $\mu\text{g}/\text{ml}$ , 90 min) (B, F) to disrupt microtubules. Nocodazole was washed out and the cells were allowed to reform microtubules in fresh medium at 37°C for 5 (C, G) or 20 min (D, H). The microtubule organization in each case was analyzed by staining for  $\alpha$ -tubulin (green). Nuclei were stained with DAPI (blue). Bar: 12  $\mu\text{m}$ .

**Video 1.** Mitosis in wild-type MEF cells

**Video 2.** Mitosis in *ARH*<sup>-/-</sup> MEF cells

**Video 3.** Mitosis in wild-type MEF cells

**Video 4.** Mitosis in ARH<sup>-/-</sup> MEF cells

**Video 5.** Example of early cytokinesis defect and frank binucleate formation in ARH<sup>-/-</sup> MEFs.

**Video 6.** Mitosis in ARH<sup>-/-</sup> MEFs after mock rescue

**Video 7.** Mitosis in ARH<sup>-/-</sup> MEFs after pMSCV-ARH rescue

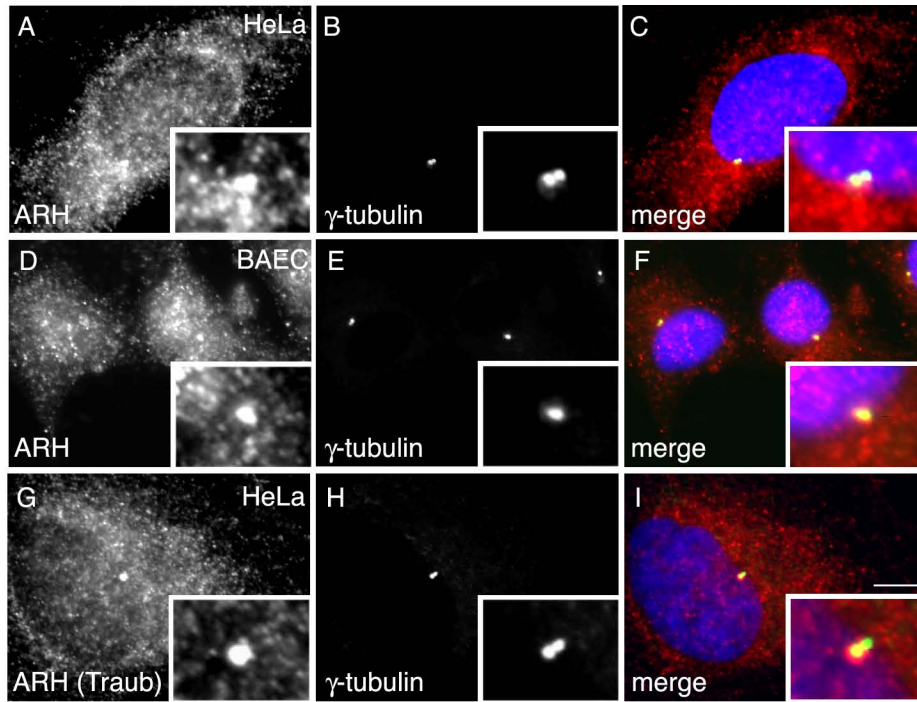

Supplemental Figure 1, Lehtonen et al 2008

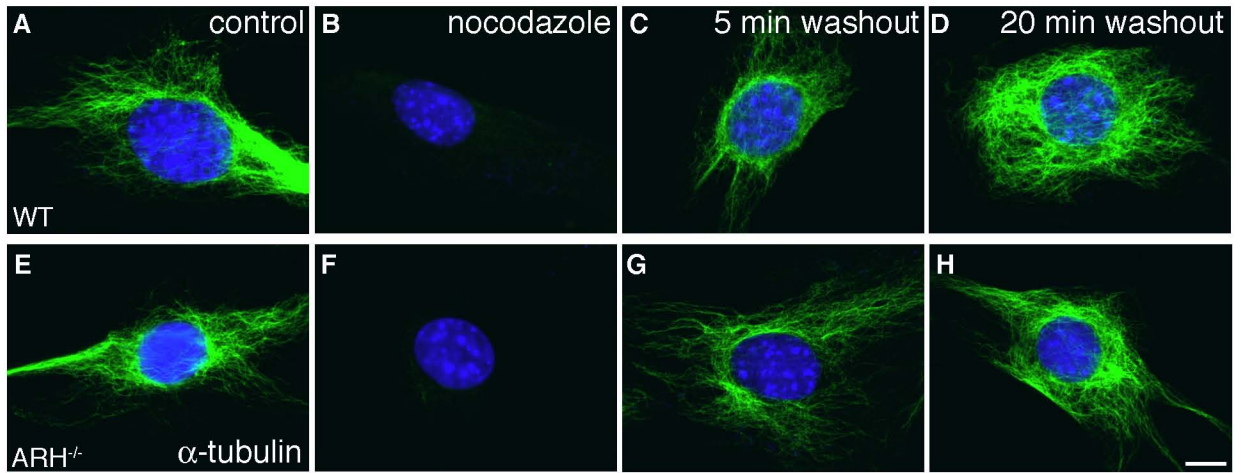

Supplemental Figure 2, Lehtonen et al 2008
